# Supplementary material
Source: Research Square preprint supplement (doi:10.21203/rs.3.rs-9483676/v1)
Supplement: Supplementary file 1 [file 3617df07032e239b5cdb3407.docx]

**Table S2: Top 10 Institutions by Number of Publications**

| Institution Name | Number of Papers | Citation Frequency | Average Citations per Paper | Country or Region |
| --- | --- | --- | --- | --- |
| University of Toronto | 22 | 1299 | 59.05 | CANADA |
| Harvard University | 15 | 886 | 59.07 | USA |
| University of Pennsylvania | 15 | 998 | 66.53 | USA |
| Western University (University of Western Ontario) | 14 | 970 | 69.29 | CANADA |
| Wroclaw Medical University | 13 | 213 | 16.38 | POLAND |
| Icahn School of Medicine at Mount Sinai | 9 | 182 | 20.22 | USA |
| University of Health Sciences Turkey | 8 | 87 | 10.88 | TURKIYE |
| Egyptian Knowledge Bank (EKB) | 8 | 124 | 15.50 | EGYPT |
| Emory University | 7 | 697 | 99.57 | USA |
| Brigham & Women's Hospital | 7 | 148 | 21.14 | USA |
