# Supplementary material
Source: Research Square preprint supplement (doi:10.21203/rs.3.rs-9483676/v1)
Supplement: Supplementary file 2 [file 53e2300146c79d0ed52fdae6.docx]

**Table S4: The Ten Journals with the Highest Publication Output**

| Journal Title | Number of papers | Citation  Frequency | Influencing  Factors | JCR  Partitioning | Country/Region of Publication |
| --- | --- | --- | --- | --- | --- |
| JOURNAL OF COSMETIC DERMATOLOGY | 20 | 273 | 2.5 | Q2 | USA |
| INTERNATIONAL JOURNAL OF DERMATOLOGY | 17 | 526 | 3.3 | Q1 | USA |
| JOURNAL OF THE EUROPEAN ACADEMY OF DERMATOLOGY AND VENEREOLOGY | 15 | 1059 | 8 | Q1 | UNITED KINGDOM |
| CUREUS JOURNAL OF MEDICAL SCIENCE | 14 | 65 | 1.3 | Q2 | USA |
| ARCHIVES OF DERMATOLOGICAL RESEARCH | 13 | 79 | 2.1 | Q3 | GERMANY |
| ACTA DERMATO-VENEREOLOGICA | 12 | 385 | 3.7 | Q1 | NORWAY |
| JOURNAL OF DRUGS IN DERMATOLOGY | 11 | 108 | 1.8 | Q3 | USA |
| JOURNAL OF THE AMERICAN ACADEMY OF DERMATOLOGY | 11 | 1084 | 11.8 | Q1 | USA |
| CLINICS IN DERMATOLOGY | 10 | 445 | 2.2 | Q2 | USA |
| BRITISH JOURNAL OF DERMATOLOGY | 9 | 1040 | 10.6 | Q1 | UNITED KINGDOM |
