# Supplementary material
Source: Research Square preprint supplement (doi:10.21203/rs.3.rs-9483676/v1)
Supplement: Supplementary file 3 [file 9b1ac0d85affd42c7e8a5bd1.docx]

**Table S1 Top 10 Countries/Regions by Number of Publications**

| Country/Region | Number of Papers | Citation Frequency | Average Citations per Paper | Percentage of Internationally Co-authored Papers | Total link strength |
| --- | --- | --- | --- | --- | --- |
| USA | 133 | 5613 | 42.20 | 36.09 | 79 |
| TURKIYE | 71 | 1431 | 20.15 | 12.68 | 56 |
| CHINA | 50 | 1252 | 25.04 | 20 | 18 |
| UNITED KINGDOM | 46 | 2085 | 45.33 | 58.7 | 102 |
| CANADA | 36 | 1857 | 51.58 | 55.56 | 37 |
| INDIA | 35 | 510 | 14.57 | 17.14 | 11 |
| GERMANY | 28 | 1308 | 46.71 | 67.86 | 78 |
| ITALY | 21 | 1294 | 61.62 | 61.9 | 73 |
| POLAND | 18 | 338 | 18.78 | 38.89 | 50 |
| SAUDI ARABIA | 16 | 116 | 7.25 | 18.75 | 4 |
