# Supplementary material
Source: Research Square preprint supplement (doi:10.21203/rs.3.rs-9483676/v1)
Supplement: Supplementary file 4 [file bb8252f0254c732a7170e71a.docx]

**Table S3: Top 10 Authors by Number of Publications**

| Researcher | Number of papers | Citation  Frequency |
| --- | --- | --- |
| Gupta, Aditya | 9 | 678 |
| Szepietowski, Jacek C. | 8 | 157 |
| Tan, Jerry | 7 | 302 |
| Krajewski, Piotr K | 7 | 54 |
| Jemec, Gregor | 6 | 573 |
| Gieler, Uwe | 6 | 386 |
| Logan, A. | 6 | 365 |
| Matusiak, L. | 6 | 28 |
| Gupta, Madhulika | 6 | 433 |
| kivanc altunay, ilknur | 5 | 126 |
